# Supplementary material for: Evaluation of HLA-G Expression in Multipotent Mesenchymal Stromal Cells Derived from Vitrified Wharton’s Jelly Tissue
Source: PubMed Central journal article supplement (PMC6316308; doi:10.3390/bioengineering5040095), 2018-11-01
Supplement: bioengineering-05-00095-s001.pdf [file bioengineering-05-00095-s001.pdf]

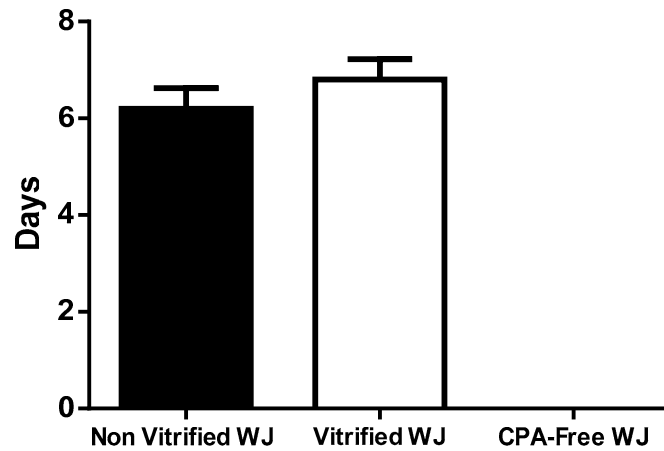

**Figure S1.** Days of first evidence of isolated MSCs from non-vitrified, vitrified and CPA-free WJ tissue samples. No MSCs were able to be isolated from CPA-free WJ tissue samples.

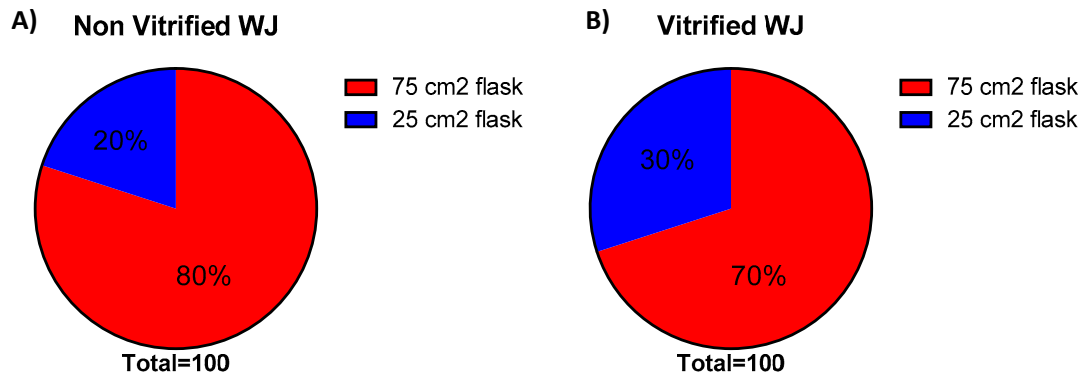

**Figure S2.** Initial passage of MSCs to cell culture flasks. A) Passage of MSCs derived from non-vitrified WJ tissue, where 80% was passaged to 75 cm<sup>2</sup> cell culture flask and the remaining 20% to 25 cm<sup>2</sup> cell culture flask. B) A) Passage of MSCs derived from vitrified WJ tissue, where 70% was passaged to 75 cm<sup>2</sup> cell culture flask and the remaining 30% to 25 cm<sup>2</sup> cell culture flask.

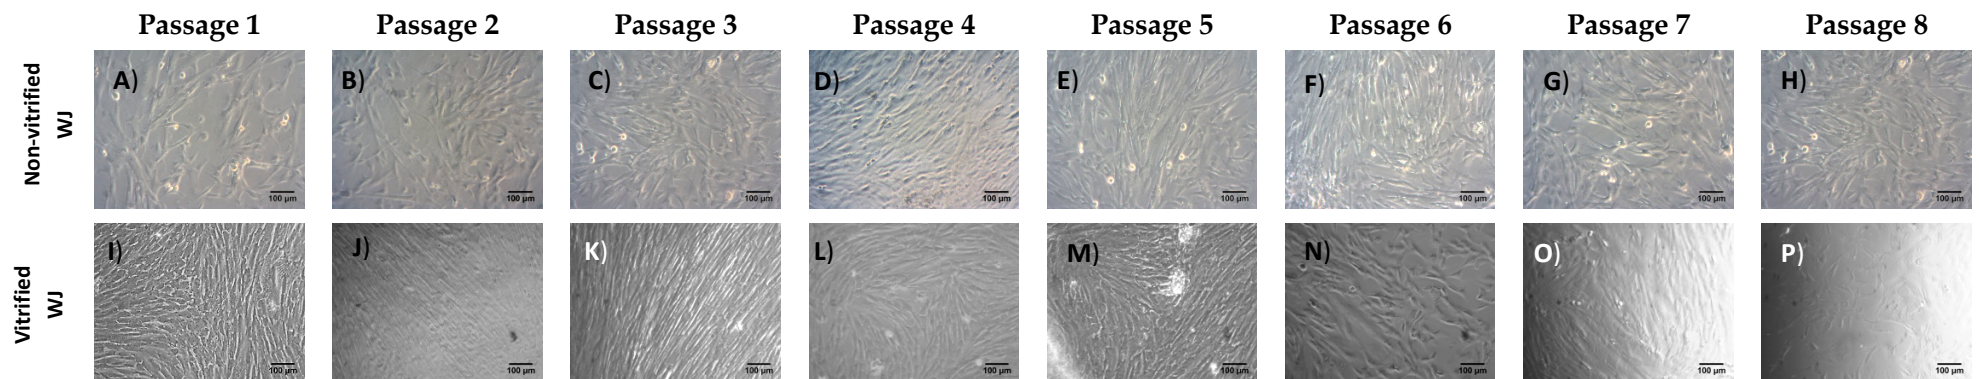

**Figure S3.** Passages of MSCs derived from non-vitrified and vitrified WJ tissue samples from 1 to 8. Passages of MSCs obtained from non-vitrified WJ tissue samples (A-H). Passages of MSCs obtained from vitrified WJ tissue samples (I-P). Original magnification 10x, scale bars 100  $\mu\text{m}$ .

**Table S1.** Flow cytometric analysis of HLA-G expression in WJ -MSCs.

| <b>Cluster of Differentiation</b> | <b>MSCs derived from non-vitrified WJ tissue</b><br>(% Expression) | <b>MSCs derived from vitrified WJ tissue</b><br>(% Expression) | <b><i>p</i> value</b> |
|-----------------------------------|--------------------------------------------------------------------|----------------------------------------------------------------|-----------------------|
| HLA-DR                            | 95.6 ± 1.2                                                         | 95.3 ± 1.6                                                     | 0.84349               |

**Table S2.** MLR results

|                           | <b>Stimulator Cells</b> | <b>Responder Cells</b> | <b>Stimulators with MSCs from non-vitrified WJ</b> | <b>Responders with MSCs from non-vitrified WJ</b> | <b>Stimulators with MSCs from vitrified WJ</b> | <b>Responders with MSCs from Vitrified WJ</b> | <b>MLR</b> | <b>MLR with MSCs from non-vitrified WJ</b> | <b>MLR with MSCs from vitrified WJ</b> |
|---------------------------|-------------------------|------------------------|----------------------------------------------------|---------------------------------------------------|------------------------------------------------|-----------------------------------------------|------------|--------------------------------------------|----------------------------------------|
|                           | 98000                   | 100000                 | 101000                                             | 95000                                             | 101200                                         | 110000                                        | 176000     | 121000                                     | 117000                                 |
|                           | 110000                  | 110000                 | 120000                                             | 110000                                            | 120000                                         | 110000                                        | 190000     | 135000                                     | 142000                                 |
|                           | 102000                  | 109000                 | 102000                                             | 109000                                            | 102000                                         | 109000                                        | 182000     | 132000                                     | 125000                                 |
|                           | 120000                  | 102000                 | 121500                                             | 102000                                            | 110000                                         | 112500                                        | 201000     | 114000                                     | 129000                                 |
|                           | 101000                  | 120000                 | 101000                                             | 120000                                            | 115000                                         | 120000                                        | 179000     | 125000                                     | 131000                                 |
|                           | 106000                  | 107000                 | 106500                                             | 107000                                            | 106000                                         | 107000                                        | 195000     | 122000                                     | 117000                                 |
|                           | 103000                  | 98000                  | 104500                                             | 115000                                            | 99500                                          | 98000                                         | 197000     | 123000                                     | 124000                                 |
|                           | 102000                  | 103000                 | 102000                                             | 103000                                            | 120000                                         | 103000                                        | 182000     | 124000                                     | 127000                                 |
|                           | 106000                  | 107000                 | 104890                                             | 106500                                            | 106000                                         | 107000                                        | 189000     | 127000                                     | 122000                                 |
|                           | 105000                  | 104000                 | 104000                                             | 104000                                            | 112500                                         | 104000                                        | 201000     | 114000                                     | 135000                                 |
| <b>Average</b>            | 105300                  | 106000                 | 106739                                             | 107150                                            | 109220                                         | 108050                                        | 189200     | 123700                                     | 126900                                 |
| <b>Standard Deviation</b> | 5815                    | 5933                   | 7215                                               | 6633                                              | 7133                                           | 5623                                          | 8693       | 6388                                       | 7395                                   |

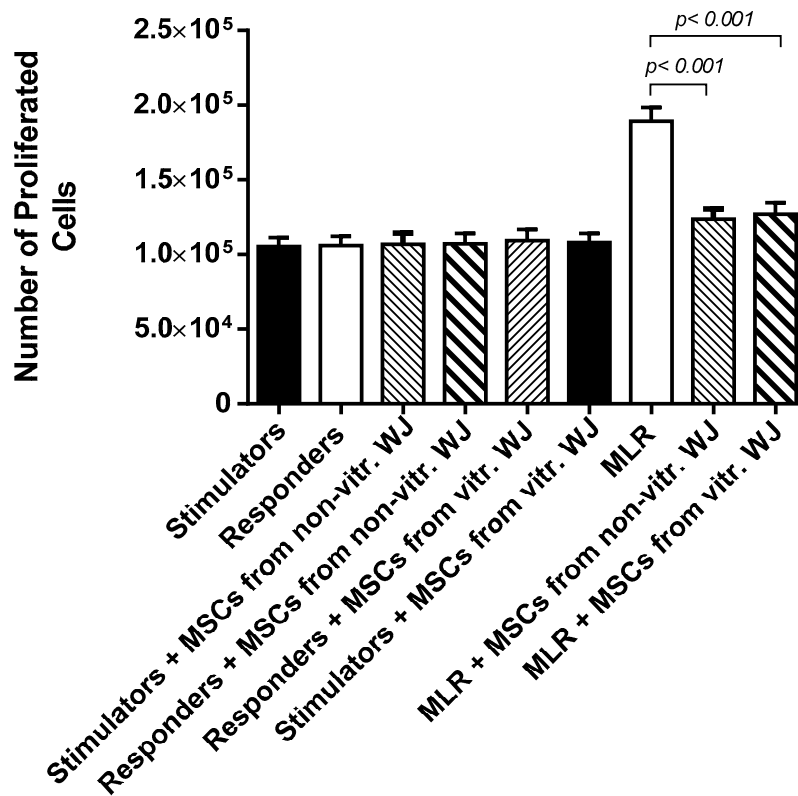

**Figure S4.** Mixed Lymphocyte reaction. Statistical significant difference was observed between MLR and MLR coupled with either MSCs from non-vitrified WJ tissue ( $p < 0.001$ ) or MSCs from vitrified WJ tissue ( $p < 0.001$ ).

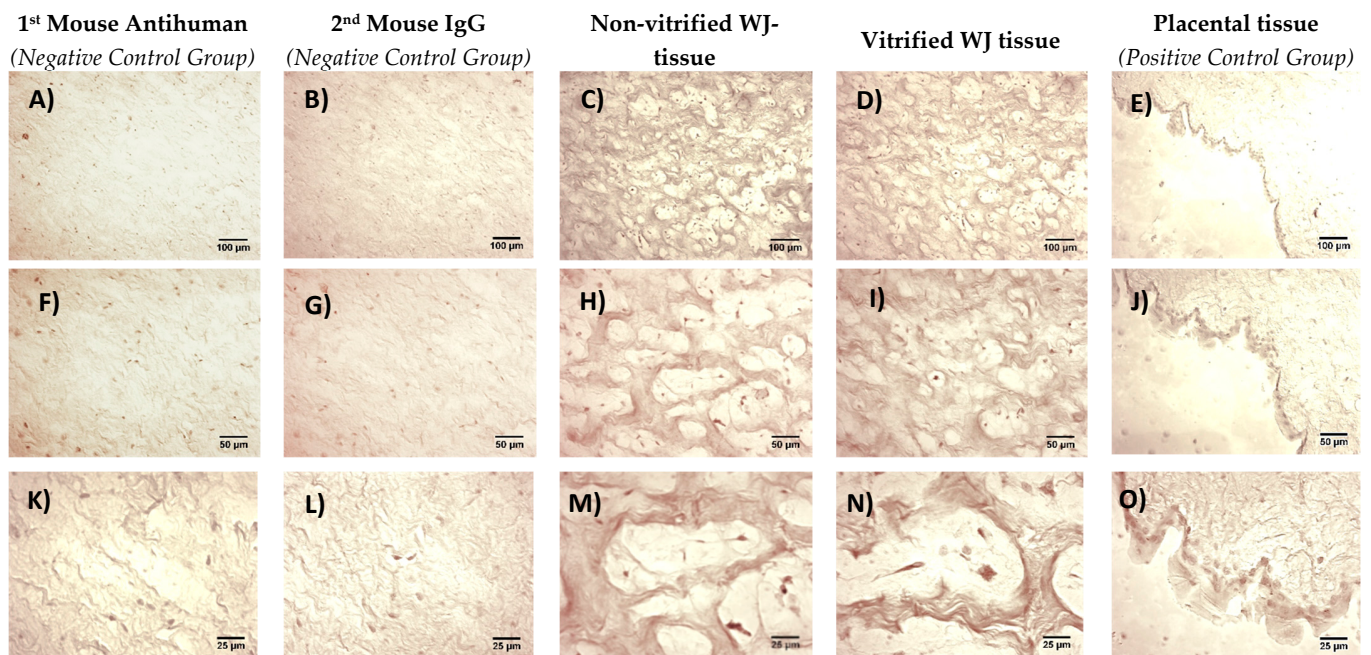

**Figure S5.** HLA-G expression in WJ tissue. 1<sup>st</sup> mouse antihuman - negative control group (A, F, K). 2<sup>nd</sup> Mouse IgG - Negative Control Group (B, G, L). Non-vitrified WJ-tissue (C, H, M). Vitrified WJ tissue (D, I, N). Placental tissue -Positive Control Group (E, J, O). Images A-E were acquired with original magnification 10x, scale bars 100  $\mu\text{m}$ . Images F-J, were acquired with original magnification 20x, scale bars 50  $\mu\text{m}$ . Images K-O, were acquired with original magnification 40x, scale bars 25  $\mu\text{m}$ .

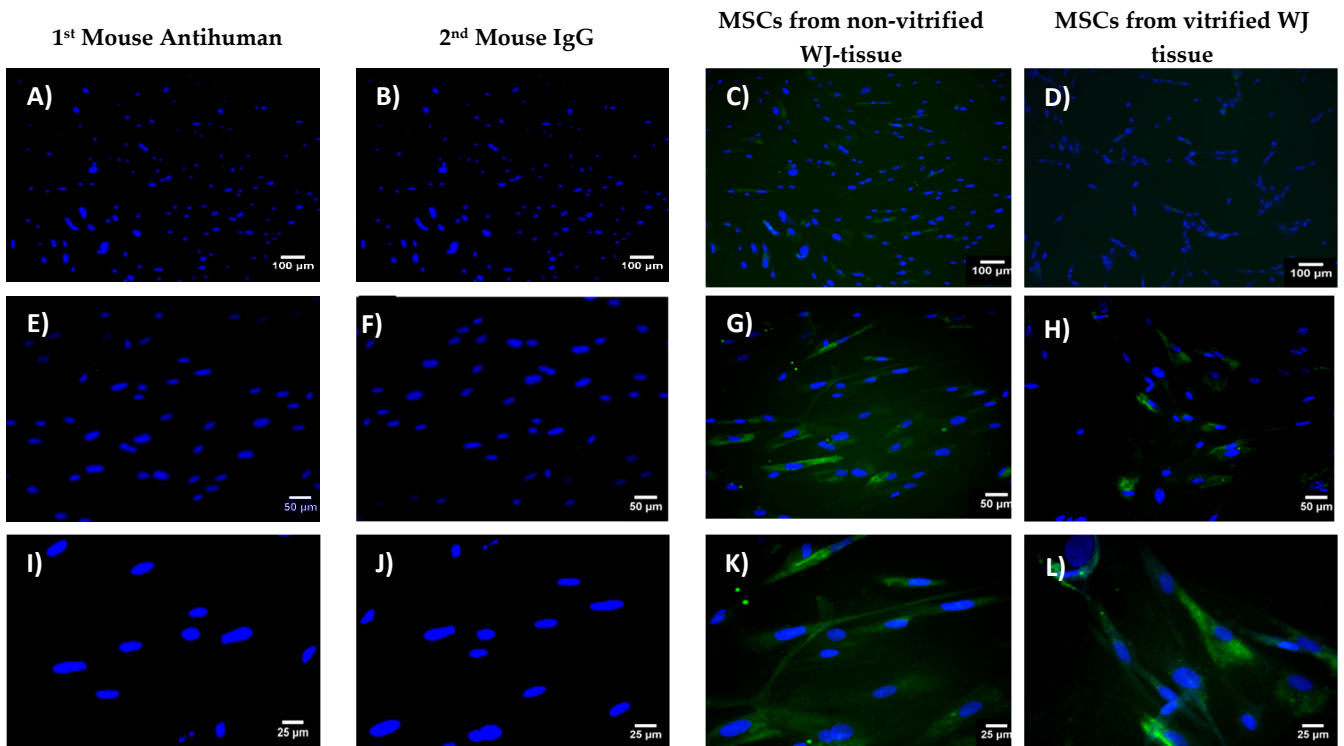

**Figure S6.** Indirect immunofluorescence for HLA-G expression in WJ-MSCs. 1st Mouse Antihuman monoclonal antibody against HLA-G (A,E,I). 2nd Mouse IgG monoclonal antibody (B, F, J). MSCs from non-vitrified WJ-tissue (C, G, K) and from vitrified WJ-tissuw (D, H, L). Images A-D were acquired with original magnification 10x, scale bars 100  $\mu$ m. Images E- H, were acquired with original magnification 20x, scale bars 50  $\mu$ m. Images I-L, were acquired wit original magnification 40x, scale bars 25  $\mu$ m.
